# Supplementary material
Source: PubMed Central journal article supplement (PMC4694080)
Supplement: chest_146_3_659_ds01.pdf [file chest_146_3_659_ds01.pdf]

## Quality Indicators for the Evaluation of Patients With Lung Cancer

Peter J. Mazzone, MD, FCCP; Anil Vachani, MD, FCCP; Andrew Chang, MD, FCCP; Frank Detterbeck, MD, FCCP; David Cooke, MD, FCCP; John Howington, MD, FCCP; Amos Dodi, MD; and Douglas Arenberg, MD, FCCP

CHEST 2014; 146(3):659-669

**e-Table 1: Number of guideline recommendations relevant to diagnosis.**

|                | ACCP | BTS/STSGBI | ESMO | NICE |
|----------------|------|------------|------|------|
| <b>Process</b> | 1    | 0          | 0    | 4    |
| <b>Biopsy</b>  | 16   | 3          | 2    | 4    |
| <b>Other</b>   | 18   | 2          | 0    | 1    |

**e-Table 2: Number of guideline recommendations relevant to staging.**

|                            | ACCP | BTS | ESMO | NICE | SEPAR |
|----------------------------|------|-----|------|------|-------|
| <b>Clinical</b>            | 1    | 0   | 2    | 0    | 0     |
| <b>CT chest</b>            | 1    | 2   | 1    | 1    | 1     |
| <b>PET</b>                 | 2    | 1   | 1    | 2    | 1     |
| <b>Mediastinal staging</b> | 11   | 3   | 1    | 9    | 7     |
| <b>Distant mets</b>        | 7    | 6   | 10   | 5    | 2     |

**e-Table 3: Number of guideline recommendations relevant to preoperative evaluation.**

|                            | ACCP | BTS/STSGBI | ERS/ESTS |
|----------------------------|------|------------|----------|
| <b>Age</b>                 | 1    |            |          |
| <b>FEV<sub>1</sub></b>     | 1    |            |          |
| <b>DLCO</b>                | 1    | 1          | 1        |
| <b>ppo</b>                 | 2    | 3          | 5        |
| <b>CPET</b>                | 3    | 1          | 3        |
| <b>Other exercise</b>      | 1    | 1          | 3        |
| <b>General</b>             |      | 3          |          |
| <b>Alternative surgery</b> | 1    | 4          | 3        |
| <b>Setting</b>             | 1    |            | 3        |
| <b>Interventions</b>       | 1    |            | 2        |

*Online supplements are not copyedited prior to posting.*
